# Supplementary material for: Active invasion of bacteria into living fungal cells
Source: eLife journal article supplement (doi:10.7554/elife.03007), 2014-09-01
Supplement: supp [file elife_poa_e03007_Figure_5_figure_supplement_2.pdf › elife_poa_e03007_Figure_5_figure_supplement_2.pdf]

|                  |     |                                                                                                     |     |
|------------------|-----|-----------------------------------------------------------------------------------------------------|-----|
| 1e15_chainA_p002 | 1   | -----TRKAVIGYYFIPTNQINNYTETDTSVVFPFVS-NITPAKAKQLTHIN                                                | 46  |
| 2dsk_chainA_p001 | 1   | -----GNANPIPEHFFAPYIDMS-----LSVHKPLVEYAKLT--GTKYFT                                                  | 39  |
| B.rhizoxinica    | 1   | MKKHLLKAIALSAMSVGLCGHAFGEGVYAPYVDMT-----AWPTPSLDEVGVRRQ--GIQQFT                                     | 55  |
| 1e15_chainA_p002 | 47  | FSFLDINSNLECAW-DPATN-----DAKARDVNNRLTALKAHNP SLRIMFSIGGWYYSNDLGVSHANYV                              | 109 |
| 2dsk_chainA_p001 | 40  | LAFILYSSVYNGPAWAGSIP-----LEKEFVDEVRELREI--GGEVITAFGGAVG-----PYLCQ                                   | 91  |
| B.rhizoxinica    | 56  | MAFVLSGGNQCVPSWGGVQPIGRGQTSDDLTSIAKSINNYRAK--GGEVSISFGGQAG-----MPLMQ                                | 116 |
|                  |     | D/TXXDXDXE                                                                                          |     |
| 1e15_chainA_p002 | 110 | NAVKT PASRAKFAQSCVRIMKDYGFDGVDIQWEY PQAAE----VDGFIAALQEI RTLLNQQTITDGRQA                            | 174 |
| 2dsk_chainA_p001 | 92  | ----QASTPEQLAEWYIKVIDTYNATYLD FDI EAGI--D-----ADKLADALLIVQRE-----R                                  | 139 |
| B.rhizoxinica    | 117 | ----ACSSASALAAAYQTVIDTYSLT H I D F D I E G A A --Q T D S A A L T R N F Q A V R Q L Q H T -----MRTNG | 173 |
| 1e15_chainA_p002 | 175 | LPYQLTIAGAGG----AFFLSRYYSKLAQIVAPLDYINLMTYDLAGPWEKVTNH-QAALFGDAAGPTFYN                              | 239 |
| 2dsk_chainA_p001 | 140 | PWVKFSFTLPSPDPIGLAGGYGIIETMAKKGVVRVDRVNPMTMDYY-----WTP-SNAENA-----                                  | 193 |
| B.rhizoxinica    | 174 | KALHVTLTLPVMPSGLTADGLRVLDAA LDNGVTLDTVNIMAMDYG-----NGTADMGAAA-----                                  | 228 |
| 1e15_chainA_p002 | 240 | ALREANLGWSWHEELTRAFFSPFSLTVDAAVQOHLMMEG-----VPSAKIVMGVPPFYGRAFKGVSG                                 | 299 |
| 2dsk_chainA_p001 | 194 | -----IKVAENVFRQLKQIYPE----KSDEEIWKMI GLT PMIGVN-----                                                | 229 |
| B.rhizoxinica    | 229 | -----KRAATSVYAQLDAA YKAAGSPKTDAQLWQMI GVTPMIGKN-----                                                | 268 |
| 1e15_chainA_p002 | 300 | GNGGOYSSHSTPGEDPY PSTDYMLVGCEECVRDKDPRIAS YROLEOMLOGNYGYORLWNDKTKT PYLYHA                           | 369 |
| 2dsk_chainA_p001 | 230 | -----DD-----                                                                                        | 231 |
| B.rhizoxinica    | 269 | -----DV-----                                                                                        | 270 |
| 1e15_chainA_p002 | 370 | ONGLEVTYDDAESFKYKAKYIKQQQLGGVMFWHLGQDN-----RNGDLLAALDRYFN                                           | 421 |
| 2dsk_chainA_p001 | 232 | ----KSVFTLEDAQQLVDWAIQHKIGSLAFWSVDRDHGPT--GEVSP LHRGTNDPDWAF SHV FVKFME                             | 294 |
| B.rhizoxinica    | 271 | ----QGETFSLADAKALLDKARSDGIGLLSNWSIGRDKACASN SGGASPS CSGVSQQPYAFTQVFRQLGG                            | 336 |
