# Supplementary figures and images for: Active invasion of bacteria into living fungal cells
Source: eLife journal article supplement (doi:10.7554/elife.03007), 2014-09-01

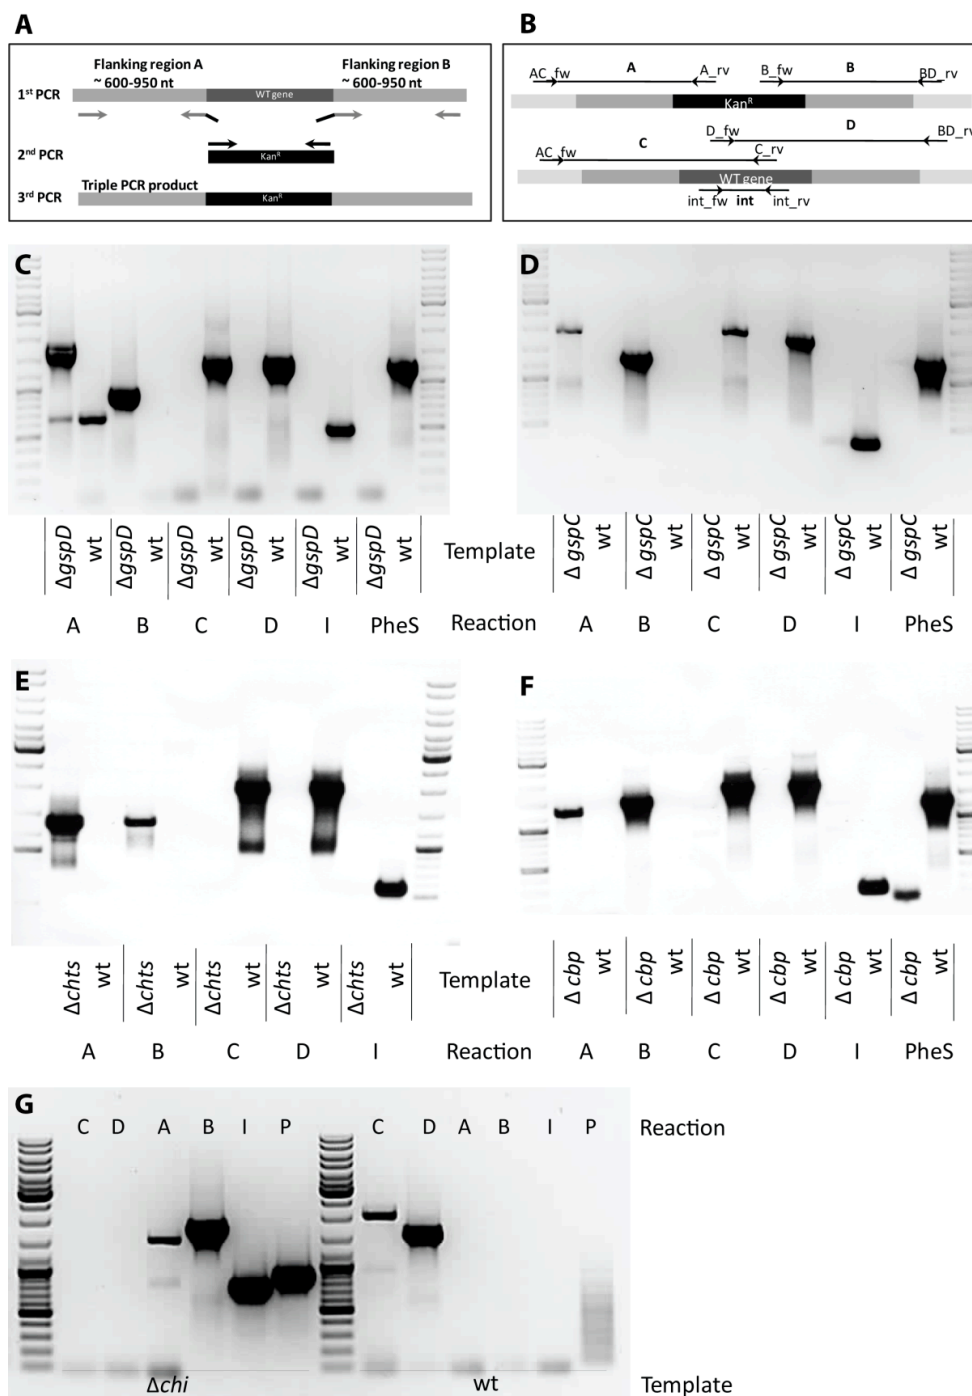

Supplement: supp [file elife_poa_e03007_Figure_3_figure_supplement_1.pdf › elife_poa_e03007_Figure_3_figure_supplement_1.pdf]

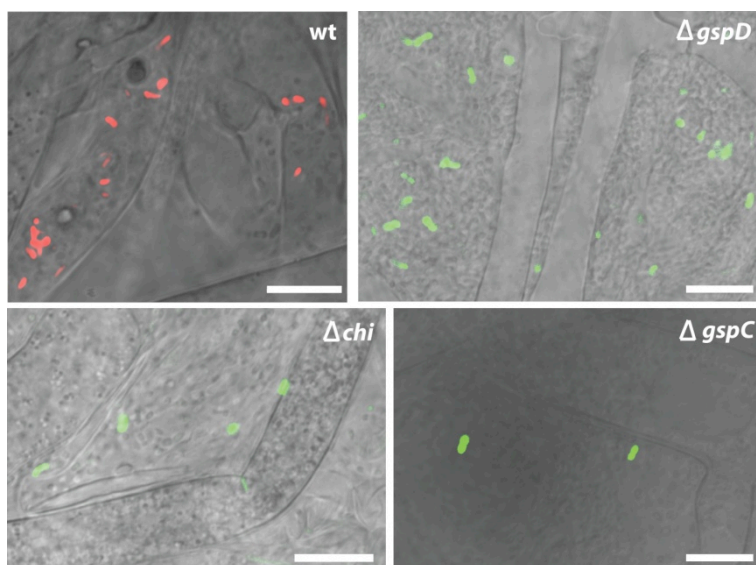

Supplement: supp [file elife_poa_e03007_Figure_3_figure_supplement_2.pdf › elife_poa_e03007_Figure_3_figure_supplement_2.pdf]

1

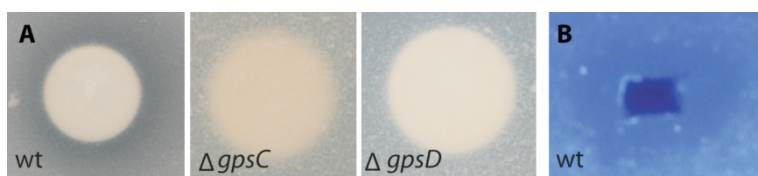

Supplement: supp [file elife_poa_e03007_Figure_5_figure_supplement_1.pdf › elife_poa_e03007_Figure_5_figure_supplement_1.pdf]
